# Supplementary material for: Diagnostic Blood Biomarkers in Alzheimer’s Disease
Source: MDPI journal article supplement (doi:10.3390/biomedicines10010169), 2022-01-13
Supplement: s1 [file s1]

**Supplementary Table S1. Participant Demographics**

| Characteristics                            | Total | CN               | aMCI             | AD Dementia      | <i>p</i> -value |
|--------------------------------------------|-------|------------------|------------------|------------------|-----------------|
| n                                          | 136   | 51               | 54               | 31               |                 |
| Age, mean (SD), y                          | 136   | 71.5 (5.4)       | 71.4 (8.4)       | 65.2 (8.7)       | < 0.001         |
| Education, mean (SD), y                    | 132   | 10.1 (4.9)       | 9.9 (5.0)        | 6.4 (3.5)        | 0.001           |
| Female sex, No. (%)                        | 136   | 27 (52.9)        | 22 (40.7)        | 21 (67.7)        | 0.055           |
| K-MMSE score, points                       | 131   | 27.0 (2.2)       | 25.2 (2.9)       | 18.9 (4.3)       | < 0.001         |
| APOE ε4 carrier, No. (%)                   | 133   | 19 (37.3)        | 28 (51.8)        | 24 (77.4)        | 0.004           |
| CSF biomarkers, mean (SD), pg/mL           |       |                  |                  |                  |                 |
| NFL concentrations, pg/mL                  | 136   | 806.1 (380.5)    | 851.8 (376.5)    | 970.4 (360.9)    | 0.080           |
| Aβ <sub>1-42</sub> concentrations, pg/mL   | 136   | 830.9 (336.2)    | 666.2 (279.6)    | 399.1 (135.1)    | < 0.001         |
| t-Tau concentrations, pg/mL                | 136   | 260.8 (107.2)    | 366.2 (213.2)    | 522.8 (217.1)    | < 0.001         |
| p-Tau <sub>181</sub> concentrations, pg/mL | 136   | 45.2 (15.6)      | 58.5 (27.0)      | 74.4 (27.0)      | < 0.001         |
| Plasma biomarkers, mean (SD), pg/mL        |       |                  |                  |                  |                 |
| NFL concentrations, pg/mL                  | 136   | 18.6 (6.5)       | 20.7 (9.4)       | 21.8 (6.6)       | 0.050           |
| Aβ <sub>1-42</sub> concentrations, pg/mL   | 136   | 11.5 (3.7)       | 10.7 (3.3)       | 8.2 (2.4)        | < 0.001         |
| Combination biomarkers, ratio              |       |                  |                  |                  |                 |
| CSF NFL/Aβ <sub>1-42</sub> ratio           | 136   | 1.25 (0.98)      | 1.66 (1.24)      | 2.62 (1.18)      | < 0.001         |
| Plasma NFL/Aβ <sub>1-42</sub> ratio        | 136   | 1.89 (1.10)      | 2.05 (1.02)      | 2.92 (1.20)      | < 0.001         |
| Neuroimaging data                          |       |                  |                  |                  |                 |
| Aβ-PET (SUVR score)                        | 135   | 1.1061 (0.15)    | 1.1710 (0.23)    | 1.3886 (0.11)    | < 0.001         |
| Hippocampal volume/ICV                     | 134   | 0.0028 (0.00032) | 0.0025 (0.00040) | 0.0021 (0.00038) | < 0.001         |
| Entorhinal cortex (mm)                     | 134   | 3.3826 (0.30533) | 3.1671 (0.43704) | 2.9403 (0.46155) | < 0.001         |

Data are presented as means (SD, standard deviation), numbers, or % unless indicated otherwise. Abbreviations: K-MMSE, Korean Mini-Mental State Examination; ICV, intracranial volume; SUVR, standardized uptake value ratio; CSF, cerebrospinal fluid; Aβ<sub>1-42</sub>, amyloid beta<sub>1-42</sub>; t-Tau, total Tau protein; p-Tau, phosphorylated Tau protein; NFL, neurofilament light chain; CN, cognitively normal; aMCI, amnesic mild cognitive impairment; AD, Alzheimer's disease. Differences were analyzed using ANCOVA adjusted for sex and age.
